# Supplementary material
Source: PubMed Central journal article supplement (PMC10150608)
Supplement: NIHMS1891670-supplement-Supplemental_tables.pdf [file NIHMS1891670-supplement-Supplemental_tables.pdf]

### Up-regulated Pathways

| Pathway                                    | Leading Edge Genes                                                                                                                                                                                                                                                                                                                                                                      |
|--------------------------------------------|-----------------------------------------------------------------------------------------------------------------------------------------------------------------------------------------------------------------------------------------------------------------------------------------------------------------------------------------------------------------------------------------|
| NABA CORE MATRISOME                        | <i>Abi3bp, Spon2, Npnt, Matn2, Postn, Ddx26b, Nid1, Fmod, Pcolce, Igfbp4, Creld2, Aebp1, Igfbp6, Sparc, Lamc1, Gas6, Col1a1, Col5a2, Mfge8, Fbn1, Bgn, Efemp1, Col18a1, Mfap5, Col3a1, Emilin1, Igfbp7, Edil3, Eln, Col4a1, Cyr61, Col1a2, Col6a2, Fbln5, Fbln2, Col6a1, Col5a1, Ogn, Vwa9, Lrg1, Col4a2, Ctgf, Tinagl1, Igfbp3, Vwf, Prelp, Ltbp4, Fn1, Pxdn, Smoc2, Mmrn2, Spock2</i> |
| KEGG ECM RECEPTOR INTERACTION              | <i>Itgb1, Itgb4, Cd47, Sdc1, Lamc1, Col1a1, Col5a2, Cd36, Itga5, Itga4, Col3a1, Cd44, Col4a1, Col1a2, Col6a2, Itga3, Itgb3, Col6a1, Col5a1, Col4a2, Itgb5</i>                                                                                                                                                                                                                           |
| REACTOME SEMAPHORIN INTERACTIONS           | <i>Nrp1, Itgb1, Erbb2, Cdc42, Crmp1, Rac1, Sema6a, Myl12b, Sema4d, Dpysl3, Hsp90ab1</i>                                                                                                                                                                                                                                                                                                 |
| PID A6B1 A6B4 INTEGRIN PATHWAY             | <i>Itgb1, Erbb2, Itgb4, Ywhah, Rac1, Cd9, Lamc1, Ywhae, Pmp22</i>                                                                                                                                                                                                                                                                                                                       |
| REACTOME EXTRACELLULAR MATRIX ORGANIZATION | <i>Mmp25, Timp2, Pcolce, Serpinh1, Col1a1, Col5a2, Furin, Col3a1, Mmp17, Col4a1, Plod1, Ppib, P4hb, Col1a2, Col6a2, Col6a1, Col5a1, Col4a2</i>                                                                                                                                                                                                                                          |

### Down-regulated Pathways

| Pathway                                                              | Leading Edge Genes                                                                                                                                                                                                                                                                                                                                                                                     |
|----------------------------------------------------------------------|--------------------------------------------------------------------------------------------------------------------------------------------------------------------------------------------------------------------------------------------------------------------------------------------------------------------------------------------------------------------------------------------------------|
| PID IL12 2PATHWAY                                                    | <i>Atf2, Cd3g, Il2, Ccl4, Il18r1, Jak2, Il12rb1, Nfkb2, Il18rap, Ccr5, Ifng, Socs1, Il2rb, Relb, Il2ra, Tbx21, Stat1, Gadd45g, Il12rb2, Gadd45b</i>                                                                                                                                                                                                                                                    |
| REACTOME GROWTH HORMONE RECEPTOR SIGNALING                           | <i>Mapk3, Stat5a, Irs2, Jak2, Socs1, Cish, Sh2b1, Socs2, Stat1, Socs3</i>                                                                                                                                                                                                                                                                                                                              |
| REACTOME INTERFERON GAMMA SIGNALING                                  | <i>Camk2d, Irf1, Oas3, Jak2, Ifng, Gbp4, Socs1, Icam1, Gbp2, Ifngr1, Gbp6, Irf8, Stat1, Ifngr2, Socs3</i>                                                                                                                                                                                                                                                                                              |
| REACTOME SRP DEPENDENT COTRANSLATIONAL PROTEIN TARGETING TO MEMBRANE | <i>Rps27a, Rps12, Rpl3, Srprb, Rpl17, Rpl23, Rpl29, Rpl26, Rpl27a, Rpl39, Rps14, Rpsa, Rpl13a, Rps9, Rpl27, Rps15a, Rplp2, Rpl41, Rpl35a, Rpl18, Rps23, Uba52, Rpl23a, Rpl18a, Rps28, Rpl36a, Fau, Rpl34, Rps16, Rps6, Rps21, Rpl13, Rps15, Rpl37, Rps7, Rps10, Rps5, Rps29, Rpl14, Rpl8, Rps24, Rps20, Rplp1, Rpl32, Rpl31, Rpl21, Rpl38, Rpl35, Rps27, Rpl37a, Rps18, Rpl36, Rps19, Rpl12, Rps25</i> |
| KEGG CYTOKINE CYTOKINE RECEPTOR INTERACTION                          | <i>Cxcl2, Il18r1, Tgfbr2, Il12rb1, Ccr8, Il18rap, Egfr, Ccr5, Ifng, Xcl1, Bmp7, Tnfrsf1b, Acvr2a, Il2rb, Tnfrsf1a, Vegfa, Il21r, Il10rb, Cxcl10, Tnf, Cxcr3, Ifnar2, Il2ra, Ifngr1, Il12rb2, Tnfsf11, Ifngr2, Tnfrsf18, Lif</i>                                                                                                                                                                        |

**Supplementary Table 1.** GSEA gene lists of sorted adipose tissue  $\gamma\delta$  T cells from 1 week KD vs Chow.

Leading edge genes for each pathway identified by Gene Set Enrichment Analysis. Up- and down- regulation indicates the direction of expression induced by KD as compared to Chow.

|                                 | % of calories |         |      | g/100 g diet |         |      |
|---------------------------------|---------------|---------|------|--------------|---------|------|
|                                 | Carbohydrate  | Protein | Fat  | Carbohydrate | Protein | Fat  |
| Control chow<br>(3.1 kcal/g)    | 58            | 24      | 18   | 44.2         | 18.6    | 6.2  |
| Ketogenic diet<br>(6.76 kcal/g) | 0.1           | 10.4    | 89.5 | 0.9          | 17.6    | 67.2 |

**Supplementary Table 2.** Diet compositions

Table containing the macronutrient composition of chow and KD diets based on percent of calories coming from each nutrient and percent of each nutrient by weight.
